# Supplementary material for: Genome-wide TOP2A DNA cleavage is biased toward translocated and highly transcribed loci
Source: PubMed Central journal article supplement — Genome Res. 2017 Jul;27(7):1238–49. doi: 10.1101/gr.211615.116 (PMC5495075; doi:10.1101/gr.211615.116), 2017-07
Supplement: supp_gr.211615.116_Supplemental_Fig_S10.pdf [file supp_gr.211615.116_Supplemental_Fig_S10.pdf]

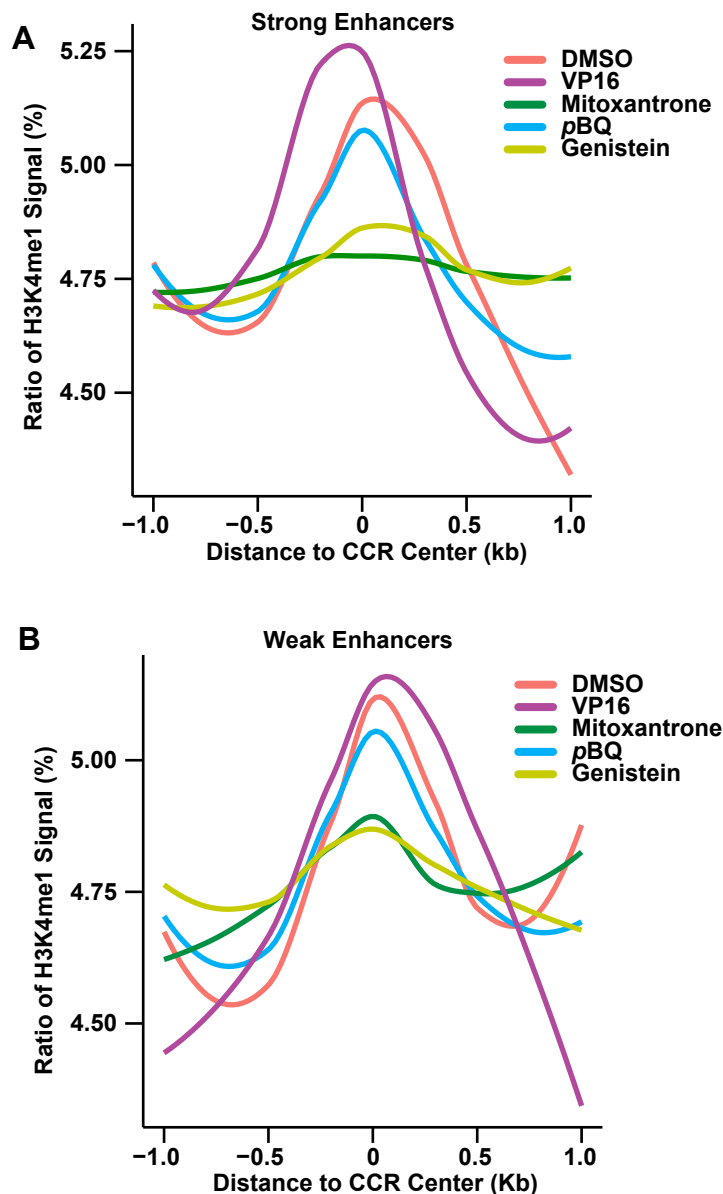

**Supplemental Fig. S10. Genome-Wide Analysis of Marks of Strong and Weak Enhancers Around TOP2A CCR Centers Compared to CCR Flanking Regions in K562 Cells.**

(A) Increased signals of strong enhancers tagged by dual H3K4me1/H3K27ac marks at CCR centers compared to 1 kb flanking sequences on either side in 100 nt sliding windows. The plot shows higher H3K4me1/H3K27ac signals directly at CCR centers. p-value < 0.001 for DMSO, VP16, pBQ; p-value < 0.01 for mitoxantrone, genistein; Kruskal-Wallis test.

(B) Increased signals of weak enhancers tagged by H3K4me1 but not H3K27ac at CCR centers compared to 1 kb flanking sequences on either side in 100 nt sliding windows. The plot shows higher H3K4me1 signals directly at CCR centers. p-value < 0.001 for DMSO, VP16, pBQ; p-value < 0.01 for mitoxantrone, genistein; Kruskal-Wallis test.

(A, B) K562 cell line data from The ENCODE Project Consortium 2012 for H3K4me1 and H3K27ac ([www.encodeproject.org](http://www.encodeproject.org)) (The ENCODE Project Consortium 2012) (See Supplemental Table S4 for GEO Accession numbers and Production Laboratories) converted from GRCh37/hg19 to GRCh38/hg38 using liftOver (<http://genome.sph.umich.edu/wiki/LiftOver>) (Hinrichs et al. 2006) were plotted to determine relationships to TOP2A CCRs. Amplified samples; TOP2 poisons indicated; same treatments merged where applicable (Supplemental Table S1). See also Fig. 7B, C.
