# Supplementary material for: Genome-wide TOP2A DNA cleavage is biased toward translocated and highly transcribed loci
Source: HighWire-hosted journal article supplement (doi:10.1101/gr.211615.116), 2017-04-06
Supplement: Supplemental_Methods.docx [file Supplemental_Methods.docx]

**Genome-Wide TOP2A DNA Cleavage is Biased Towards Translocated and Highly Transcribed Loci**

**Supplemental Methods**

Xiang Yu1,11, James W. Davenport2,11, Karen A. Urtishak2, Marie L. Carillo2,8, Sager J. Gosai1,9, Christos P. Kolaris2,10, Jo Ann W. Byl3, Eric F. Rappaport4, Neil Osheroff3,5,6, Brian D. Gregory1,12, Carolyn A. Felix2,7,12

1. Biology Department, University of Pennsylvania, Philadelphia, PA 19104
2. Division of Oncology, Children’s Hospital of Philadelphia, Philadelphia, PA 19104
3. Department of Biochemistry, Vanderbilt University, Nashville, TN 37232
4. NAPCore, Children's Hospital of Philadelphia, Philadelphia, PA 19104
5. Department of Medicine (Hematology/Oncology), Vanderbilt University, Nashville, TN 37232
6. VA Tennessee Valley Healthcare System, Nashville, TN 37212
7. Department of Pediatrics, Perelman School of Medicine, University of Pennsylvania, Philadelphia, PA 19104
8. Current address: Department of Pediatrics, Alpert Medical School, Brown University, Providence, RI 02903
9. Current address: Harvard University Medical School, Boston, MA 02115
10. Current address: QPS Holdings, LLC, Newark, DE 19711
11. Co-First Authors
12. Co-Corresponding Authors

**TABLE OF CONTENTS**

|  |  |
| --- | --- |
| **SUPPLEMENTAL METHODS…...…………………………….……………………………….…4** |  |
| Cell Culture and Lysate Preparation……………………………………………………………….. | 4 |
| Immunocapture of TOP2A Including TOP2A in Cleavage Complexes from Sonicated Lysates………………………………………………………………………………………………… | 5 |
| Release of TOP2A Bound DNA from Cleavage Complexes using Calf Intestinal Alkaline Phosphatase (CIP), DNA Purification and Quantification……………………………………….. | 5 |
| Elution of TOP2A from Magnetic Beads and Western Blot Analysis of Specificity of TOP2A Immunocapture………………………………………………………………………………………. | 6 |
| Pre-Amplification of DNA Released from TOP2A Cleavage Complexes and Input DNA from Sonicated Lysates……………………………………………..…………………………………….. | 7 |
| Library Synthesis and Sequencing of DNA Released from TOP2A Cleavage Complexes…. | 7 |
| TOP2A *in vitro* Cleavage Assays…………….…………………………………………………….. | 8 |
| Read Processing and Alignment…………………………………………………………………… | 9 |
| Analysis of Preferred Hexanucleotides at TOP2A Cleavage Sites …...……………………….. | 10 |
| Identification of Cleavage Cluster Regions (CCRs)………………………..…………………….. | 10 |
| Functional Analysis of CCRs…………………………………………………………….…………. | 11 |
| CCR Enrichment Analysis in Cancer-Associated Fusion Genes …………………….………... | 12 |
| TOP2A Double Strand Break (DSB) Enrichment Analysis in *KMT2A* Recombinome ………. | 13 |
| Comparisons of CCRs with K562 Cell Line RNA-Seq Datasets……………………………….. | 13 |
| Comparisons of CCRs with Data from The ENCODE Project Consortium 2012 for Chromatin Features in the K562 Cell Line…………………………..………….………………… | 14 |
| Principal Component Analysis of Chromatin Features in TOP2A CCR Genomic Landscape ……………………………………………………………………………………………. | 14 |
| Statistical Methods…………………………………………………………………………………… | 15 |
| **DATA ACCESS INSTRUCTIONS……………………..……………………….……………… 16** |  |
| **SUPPLEMENTAL REFERENCES…………..……………………………………….………... 19** |  |

**SUPPLEMENTAL METHODS**

**Cell Culture and Lysate Preparation**

K562 (ATCC CCL 243) cells were grown to 0.5×106 cells/mL in 20 mL of IMDM-10% FSC in T75 flasks. The 107 cells in medium were treated with 25 μM etoposide (Sigma-Aldrich E1318), 2 μM mitoxantrone (Sigma-Aldrich M6545) or 50 μM genistein (Sigma-Aldrich G6776) in DMSO (0.05% final concentration) × 1 h, with 8 μM *p*-benzoquinone (Sigma B-Aldrich 10358) in DMSO (0.05% final concentration) × 4 h, or with the DMSO vehicle control (0.05% final concentration) × 1 or 4 h. The cells were collected by centrifugation and washed once with PBS at room temperature. Cell pellets were lysed by addition of 1 mL ice-cold RIPA buffer (50 mM Tris-HCl pH 7.5, 150 mM NaCl, 1% Igepal CA-630, 1% Sodium deoxycholate, 0.5% SDS with 1× Roche Complete EDTA-free Protease Inhibitor Cocktail) and transferred to microcentrifuge tubes. Lysates were incubated on ice × 15 min and passed through a 25 g needle four times and then through a 27 g needle four times. Clumps and debris were removed by centrifugation × 20 min at 4°C in an Eppendorf microcentrifuge at 13.2 × 103 rpm.

The supernatants were sonicated at high power in a Diagenode Bioruptor to fragment the DNA to peak sizes between 250 and 1000 bp (range 100 – 1500 bp). The DNA in a 25 μL test aliquot of each sonicated lysate was purified by extraction with a 25:24:1 mixture of phenol:chloroform:isoamyl alcohol followed chloroform extraction and ethanol precipitation. The purified DNA was resuspended in 25 μL dH20 and a 2 μL aliquot representing 0.2% of each sonicated lysate was brought to 5 L final volume in 1x Thermo DNA loading buffer / 1% SDS and size-separated on a 1.5% agarose gel in 1X TAE buffer (40 mM Tris, 31.25 mM sodium acetate, 1 mM EDTA) to evaluate DNA fragmentation.

The sonicated lysates were frozen overnight at -20°C before TOP2A immunocapture.

**Immunocapture of TOP2A Including TOP2A in Cleavage Complexes from Sonicated Lysates**

TOP2A including any TOP2A in cleavage complexes was immunocaptured by addition of 20 μg rabbit anti-TOP2A polyclonal antibody (Kamiya PC-123) to each 1 mL of sonicated lysate, incubation with rotation at ~6 rpm at 4°C × 1 h, addition of 50 μL of Protein G magnetic beads (PureProteome Millipore) and incubation at room temperature with rotation × 10 min. The beads were collected with a magnet, washed twice with 500 μL Dulbecco’s PBS (GIBCO 14190) containing 0.1% Tween 20 (Sigma P1379) and set aside on ice. The non-bound fractions of the lysates were subjected to two further rounds of immunocapture as per above. At each round of immunocapture, a 25 μL aliquot of the supernatant was set aside for Western blot analysis. The beads from each of the three successive rounds of immunocapture were combined, washed three more times with Dulbecco’s PBS containing 0.1% Tween 20 and then twice with 1× NEB Buffer 3.

**Release of TOP2A Bound DNA from Cleavage Complexes using Calf Intestinal Alkaline Phosphatase (CIP), DNA Purification and Quantification**

The DNA covalently attached to TOP2A in cleavage complexes by phosphodiester linkage was detached from the antibody-bound TOP2A by incubation of the beads with 60 U CIP (New England Biolabs M0290) in 150 μL 1× NEB Buffer 3 at 37°C × 1 h. The beads were removed from the eluate containing the released DNA with a magnet. The eluates were transferred to low-bind tubes (Eppendorf) and brought to 200 μL by addition of 50 μL 1× NEB Buffer 3. The DNA was purified by extraction using 200 μL of a 25:24:1 mixture of phenol:chloroform:isoamyl alcohol. Then, 1/10 volume 3M sodium acetate, 20 μg glycogen (Roche) and either 2.5 × volume of ethanol or 1 × volume of iso-propanol were added and the DNA was precipitated overnight. The DNA was collected by centrifugation at 13.2 × 103 rpm × 30 min at 4°C. The DNA pellets were washed twice with 70% ethanol and resuspended in 12 μL DEPC water (Ambion AM9937). Two μL of each sample were used to quantify the DNA using a Quant-iT HS DNA assay (Life Technologies).

**Elution of TOP2A from Magnetic Beads and Western Blot Analysis of Specificity of TOP2A Immunocapture**

Following release of the TOP2A-bound DNA from the beads by CIP incubation, the beads were washed twice in 150 μL PBS-0.1% Tween 20 (PBS-T), resuspended in 150 μL PBS-T and equally redistributed into three clean tubes. The PBS-T was removed and 25 μL 1X LDS sample buffer (Invitrogen) containing 2.5% 2-mercaptoethanol was added to the first tube and the tube was heated at 80°C for 10 min to elute the bead-bound TOP2A. The LDS sample buffer solution containing the eluted TOP2A was collected from the first tube and used to sequentially elute the bead-bound TOP2A from the other two aliquots of beads by the same procedure.

Following elution of the TOP2A from the third aliquot of beads, 50% of the sample buffer containing the eluted TOP2A was used for Western blot analysis alongside a 10 L aliquot of the sonicated input (1% of total lysate) and 10 L aliquots representing ~1% of each of the three non-bound fractions in 1X sample buffer / 2.5% 2-mercaptoethanol. The proteins and 10 L Novex Sharp Pre-Stained Protein Standard (Life Technologies) were size-separated on a 3-8% Tris Acetate SDS-PAGE gel (Life Technologies) and transferred onto a PVDF membrane (0.45 μm, Life Technologies). The membrane was incubated overnight at 4°C with 1:1000 anti-TOP2A (SC-56803, Santa Cruz Biotechnlogy) or 1:1000 anti-BECN1 (SC-48341, Santa Cruz Biotechnlogy) mouse antibodies followed by incubation with HRP-conjugated anti-mouse secondary antibody (1:2000) for 1 hr at room temperature and detection using Amersham ECL Prime (GE Healthcare Life Sciences).

**Pre-Amplification of DNA Released from TOP2A Cleavage Complexes and Input DNA from Sonicated Lysates**

Where applicable, *e.g.* in event of <5 ng DNA recovery ([Ram et al. 2011](#_ENREF_25)), the DNA samples or 0.4 ng of purified sonicated lysate input DNA were amplified using a SEQXE kit (Sigma-Aldrich). The primers were removed from the amplified products with SEQXE kit reagents. The amplified DNA was purified on a spin column (Promega A9281) and recovered in 50 μL nuclease-free water provided with the kit.

**Library Synthesis and Sequencing of DNA Released from TOP2A Cleavage Complexes**

The ends of non-pre-amplified DNA in a 2.5 μL aliquot of the purified sonicated lysate, as well as the DNA ends in samples that were not pre-amplified after CIP release from TOP2A cleavage complexes, were repaired using End Repair Mix (TruSeq ChIP Sample Preparation Kit; Illumina IP-202-1012 or 1024) per manufacturer’s instructions.

The DNA ends in the pre-amplified samples were repaired according to the SEQXE protocol. In detail, the DNA in 40 μL of the 50 μL sample recovered as per above in nuclease free water, was treated × 15 min at 12°C in a reaction mixture containing 1 U T4 DNA polymerase (New England Biolabs M0203), 1 × New England Biolabs Buffer 2, 0.1 mg/mL BSA (New England Biolabs) and 0.1 mM dNTP mix. The reaction was stopped by adding 1 μL 0.5 M EDTA (Fisher Scientific), and the volume was adjusted to 100 μL by adding 50 μL of the Resuspension Buffer in the Illumina kit.

Regardless of whether the DNA was pre-amplified, the preparation of libraries for sequencing was performed according to the Illumina protocol. After end repair, the DNA was purified by adding 160 μL AMPure XP beads (Agencourt A63881) to the 100 μL reaction mixture. The 3’ ends of the DNA were adenylated, and indexed Illumina adapters were ligated to the DNA fragments using the TruSeq ChIP Sample Preparation Kit. The resulting libraries were electrophoresed on a 2% agarose gel, eluted from gel slices and purified on spin columns using a MinElute Gel Extraction Kit (Qiagen 28604). The libraries were PCR enriched using 18 or 15 cycles for non-pre-amplified and pre-amplified samples, respectively. The DNA yield per library was measured using a NanoDrop spectrophotometer (Thermo Scientific) and the size distribution was assessed on a Bioanalyzer DNA1000 chip (Agilent Genomics). Libraries meeting purity (A260/A280 > 1.8) and size (main peak 225-375 bp) quality control criteria were sequenced. The sequencing (SE50) was performed by BGI@CHOP on an Illumina HiSeq2500 instrument at a minimum coverage of 30M reads per library. The actual coverage achieved for each library that was sequenced was ≥ 41M reads (*c.f.* Supplemental Table S1).

**TOP2A *in vitro* Cleavage Assays**

Subcloning was performed, DNA substrates were prepared and TOP2A *in vitro* cleavage assays were carried out as described ([Felix et al. 1995](#_ENREF_7); [Lovett et al. 2001a](#_ENREF_15); [Lovett et al. 2001b](#_ENREF_16); [Whitmarsh et al. 2003](#_ENREF_30); [Mistry et al. 2005](#_ENREF_19); [Robinson et al. 2008](#_ENREF_26)). PCR amplified DNA fragments of the *KMT2A* bcr comprising GRCh38/hg38 positions 118,484,197-371, 118,484,320-907, 118,488,339-611 or 118,484,536-656 of Chr 11 (NC_000011.10) were subcloned into pBluescript II SK+. Nicks were repaired in 20 g of plasmid DNA containing each fragment of interest using T4 DNA ligase (New England Biolabs). The fragment was released by restriction enzyme cleavage and the 5’ ends were dephosphorylated using CIP (NEB). The fragment was radiolabeled by treatment with polynucleotide kinase (New England Biolabs) and 1.5 mCi [ (Perkin Elmer) followed by further restriction enzyme cleavage to create a singly 5’ end-labeled fragment to be used as the substrate. The singly 5’ end-labeled substrate was separated in a 1.5% agarose gel in 1× TAE, purified from the gel and used in the cleavage assays. Alternatively, non-radiolabeled substrates were prepared as per above except that the T4 polynucleotide kinase reaction was performed with cold ATP. Each 50 μL cleavage reaction contained a total of 25 ng substrate DNA comprising 30,000 cpm radiolabeled DNA and the remainder non-radiolabeled, +/- 2.5 g recombinant TOP2A, +/- 20 μM TOP2 poison, 4% DMSO, 10 mM Tris-Cl (8.0), 100 mM KCl, 0.1 mM EDTA and 5 mM MgCl2. Reactions were carried out at 37°C × 10 min. The cleavage complexes were irreversibly trapped by adding 5 μL 10% SDS, followed by addition of 3.75 μL 250 mM EDTA. The reaction products were deproteinized by incubation with Proteinase K (60 g/mL final concentration) at 45°C × 30 min, precipitated twice in ethanol, resuspended in 6 μL Stop Solution (Sequenase kit; USB Corporation), and then resolved in a denaturing polyacrylamide gel alongside a dideoxy DNA sequencing ladder of the relevant substrate. Gels were imaged by autoradiography and analyzed by scanning densitometry (Bio-Rad GS-800).

**Read Processing and Alignment**

Raw reads were aligned to the human genome version GRCh38/hg38 (Release date: Dec. 2013) using Bowtie2 (version 2.1.0) in default end-to-end mode reporting 1-2 alignments per read ([Langmead and Salzberg 2012](#_ENREF_13)). SAM mapping files were converted to BAM files and sorted with SAMtools (version 0.1.19) ([Li et al. 2009](#_ENREF_14)). The BAM files were converted to BED files, filtering sites with multiple reads and only retaining reads that mapped uniquely. The reads that mapped uniquely were normalized to RP10M (reads per 10 million reads mapped) for further analysis. BED files were converted to bedgraph and then to bigwig files ([Kent et al. 2010](#_ENREF_12)), which were uploaded to the UCSC Genome Browser (<http://genome.ucsc.edu/>) ([Kent et al. 2002](#_ENREF_11)). Correlation coefficients of reads in 10 kb windows were calculated for biological replicates to evaluate reproducibility.

TOP2A cleavage sites were identified as the most 5’ bases (*i.e.* +1 position of cleavage sites on plus strand, and +1 position of cleavage sites on minus stand corresponding to plus strand position +4; Fig. 1A) of all reads that both mapped uniquely and showed a 4-fold enrichment compared to input at the same specific base at a p-value < 0.05 (Audic and Claverie test) ([Audic and Claverie 1997](#_ENREF_2)).

**Analysis of Preferred Hexanucleotides at TOP2A Cleavage Sites**

The bases at positions -1 to +5 of each cleavage site in the sense strand were defined as hexanucleotides in which position +1 was the site of TOP2A attachment. The hexanucleotides on the minus strand were recorded as the complementary sense strand sequences (*i.e.* minus strand position +1 is complementary to position +4 of the sense strand hexanucleotide). The ratio of the frequency of each hexanucleotide in DMSO-treated samples and TOP2 poison-treated samples was calculated relative to the frequency of the same hexanucleotide in the genome. Hexanucleotides that were enriched at least 2-fold in the DMSO-treated samples relative to the genome were defined as TOP2A specific. Hexanucleotides that were enriched at least 2-fold in TOP2 poison-treated but not DMSO-treated (native) samples identified TOP2A poison sequence preferences. The preferred hexanucleotides at TOP2A cleavage sites that these analyses identified were compared with reported sequence preferences for cleavage by TOP2 previously detected by *in vitro* assays ([Capranico et al. 1993](#_ENREF_6); [Palumbo et al. 1994](#_ENREF_21); [Capranico and Binaschi 1998](#_ENREF_5); [Bandele and Osheroff 2007](#_ENREF_3)).

**Identification of Cleavage Cluster Regions (CCRs)**

Adjacent cleavage sites were collapsed if separated by ≤ 200 bp, allowing closely spaced cleavage sites to be combined into CCRs similar to Spo11 hotspots ([Pan et al. 2011](#_ENREF_22)). CCR boundaries were defined by the first and last cleavage sites in each cluster. CCRs were subsequently filtered to require a 25 nt minimum length and 4-fold enrichment of total read counts normalized to RP10M over input in the exact regions of the CCRs ([Pan et al. 2011](#_ENREF_22)). The requirement of 4-fold enrichment of all reads over input adds further stringency by eliminating candidate CCRs with high background signals from extraneous non-cleavage sites. For further analysis, the strength of CCR signals was defined as the sum of read counts at all qualifying TOP2A cleavage sites within the CCR, normalized to hits per 10 million reads (HP10M), where each individual TOP2A cleavage site in the CCR showed at least 4-fold signal enrichment compared to sonicated input at the same specific base with a p-value < 0.05 ([Audic and Claverie 1997](#_ENREF_2)). CCRs from replicate amplified samples were merged as union sets of CCRs from similarly treated samples or, alternatively, as union sets containing all CCRs from all amplified DMSO and TOP2 poison-treated samples. Further analyses were based on the merged CCR datasets. The sum of normalized CCR signals across each chromosome divided by chromosome length (HP10M reads per Mb) was calculated to determine CCR density by chromosome.

**Functional Analysis of CCRs**

The CCRs were compared with exons and introns of coding genes, pseudogenes, lincRNAs, repeats and promoters. A human genome annotation file (GRCh38/hg38 gff3 annotation file)

from GENCODE (<http://www.gencodegenes.org>) ([Harrow et al. 2012](#_ENREF_8)) was downloaded, and annotations of exons and introns of protein-coding genes, pseudogenes, lincRNAs, repeats and promoters were extracted. All annotation of each of these genome elements was done ‘greedily’*, i.e.* all classes that overlapped with a given CCR were counted equally. Random length-matched datasets of 10,000 regions were sampled from GRCh38/hg38 as genomic background controls.

The CCRs were compared with human single nucleotide polymorphism (SNP) data to evaluate sequence conservation. SNP data for GRCh38/hg38 from The 1000 Genomes Project Consortium 2015 (<ftp://ftp.ncbi.nlm.nih.gov/snp/organisms/human_9606_b142_GRCh38/BED/>) ([The 1000 Genomes Project Consortium 2015](#_ENREF_27)) were downloaded, and the number of SNPs per 100 nt windows in the 10 kb surrounding CCR centers was calculated.

To determine trends in CCR positions within genes, each gene was divided into 100 equally-sized segments, and the number of CCRs in each segment was determined. Significance was assessed using Pearson chi-squared tests for CCR enrichment compared to the random background control (*c.f.* Statistical Methods below).

For Gene Ontology (GO) term classification, TOP2A CCR containing genes common to a union set of all amplified DMSO and TOP2 poison treated samples (Supplemental Table S1) were analyzed using an online tool for functional classification and viewed in pie chart format ([http://pantherdb.org](http://pantherdb.org/)) ([Mi et al. 2013](#_ENREF_18)). Each gene was sorted to a single GO term category.

The relationship between length and gene-level CCR signal strength was investigated for four categories (<10 kb, 10-49 kb, 50-99 kb and ≥100 kb) of coding genes or lincRNA loci. Coding gene and lincRNA lengths were based on GRCh38/hg38. For these analyses, to control for the tendency of longer genes to have more CCRs by virtue of increased sequence space, genic CCR signal strength was defined as the average of all CCR signal strengths within any given locus, *i.e.* Pearson chi-squared test was used to evaluate significance as per the Statistical Methods section (*c.f.* below). Coding genes and lincRNA loci were classified as having lower or higher than average genic CCR signal strength to plot CCR signal strength *vs.* transcript abundance within length categories, where transcript abundance was ascertained from two replicates of RNA-seq datasets for untreated K562 cells (GEO Accession number GSE46718) as described below ([Bansal et al. 2014](#_ENREF_4)).

**CCR Enrichment Analysis in Cancer-Associated Fusion Genes**

Genes containing CCRs were compared to the *KMT2A* recombinome ([Meyer et al. 2013](#_ENREF_17)) and to cancer-associated fusion genes in the Mitelman database ([Mitelman et al. 2016](#_ENREF_20)). *KMT2A* partner genes were extracted from a comprehensive list of the *KMT2A* recombinome ([Meyer et al. 2013](#_ENREF_17)). A file of fusion genes was downloaded from the Mitelman database of Chromosome Aberrations and Gene Fusions in Cancer (<http://cgap.nci.nih.gov/Chromosomes/Mitelman>) ([Mitelman et al. 2016](#_ENREF_20)). Proportions of genes in the *KMT2A* recombinome ([Meyer et al. 2013](#_ENREF_17)) or all cancer fusion genes ([Mitelman et al. 2016](#_ENREF_20)) containing CCRs were compared to proportions of coding genes in the genome containing CCRs. Significance was determined using Pearson chi-squared test as per the Statistical Methods section (*c.f.* below).

**TOP2A Double Strand Break (DSB) Enrichment Analysis in *KMT2A* Recombinome**

Proportions of genes in the *KMT2A* recombinome containing TOP2A DSBs were compared to the proportions of coding genes in the genome containing TOP2A DSBs. Significance was determined using Pearson chi-squared test as per the Statistical Methods section (*c.f.* below).

**Comparisons of CCRs with K562 Cell Line RNA-seq Datasets**

Transcript abundance for all genes was compared to transcript abundance for genes containing TOP2A CCRs. Two replicates of RNA-seq datasets for untreated K562 cells were downloaded from GEO (Accession number GSE46718) ([Bansal et al. 2014](#_ENREF_4)). SRA data were converted to FASTQ files and aligned to GRCh38/hg38 using TopHat ([Trapnell et al. 2009](#_ENREF_29)) with default parameters and GENCODE annotation (<http://www.gencodegenes.org>) ([Harrow et al. 2012](#_ENREF_8)). Mapped reads of coding or lincRNA loci were counted using HTSeq ([Anders et al. 2015](#_ENREF_1)) (htseq-count with parameter stranded=no) and then normalized to RPKM (Reads Per Kilobase of transcript per Million reads mapped). The distribution of transcript abundance density for all coding genes or lincRNA loci, respectively, was compared to that of coding genes or lincRNA loci with ≥ 1 CCRs (*c.f.* Statistical Methods). The same RNA-seq datasets ([Bansal et al. 2014](#_ENREF_4)) were used to analyze the relationship between coding gene or lincRNA length and transcript abundance. The smooth.function (geom_smooth) in the ggplot2 package was used to fit the data (<http://ggplot2.org>) ([Wickham 2009](#_ENREF_31)) and correlation coefficients were calculated for the log2 values for length and transcript abundance as detailed in the Statistical Methods (*c.f.* below). Coding genes or lincRNA loci were separated into four length categories (<10 kb, 10-49 kb, 50-99 kb and ≥100 kb) and then sub-classified as having lower or higher than average genic CCR signal strength, and transcript abundance was compared as a function of CCR signal strength within each length interval.

**Comparisons of CCRs with Data from The ENCODE Project Consortium 2012 for Chromatin Features in the K562 Cell Line**

Publically available K562 cell line ChIP-seq data from The ENCODE Project Consortium 2012for H3K36me3, H3K4me1, H3K27ac and POLR2A, as well as DNase I hypersensitivity site (DHS) data ([www.encodeproject.org](http://www.encodeproject.org)) ([The ENCODE Project Consortium 2012](#_ENREF_28)) (*c.f.* Supplemental Table S4 for GEO Accession numbers and Production Laboratories) were downloaded from the NCBI (<http://www.ncbi.nlm.nih.gov/geo/query/acc.cgi?acc=GSE51334>) and liftOver (<http://genome.sph.umich.edu/wiki/LiftOver>) ([Hinrichs et al. 2006](#_ENREF_9)) was used to convert the genomic positions in the datasets from GRCh37/hg19 to GRCh38/hg38. Each H3K36me3 broad peak that overlapped with a gene body was scored as TOP2A-cleaved or non-cleaved using BEDtools ([Quinlan and Hall 2010](#_ENREF_23)) depending on whether or not there was overlap with TOP2A CCRs. Similarly, broad peaks for POLR2A sites, DHSs, H3K4me1 and H3K27ac were marked as overlapping or non-overlapping with CCR sequences using BEDtools ([Quinlan and Hall 2010](#_ENREF_23)). H3K4me1 or H3K27ac signals per 100 nt windows were determined relative to the total H3K4me1 or H3K27ac signals, respectively, within 2 kb surrounding CCR centers to analyze enhancer elements.Significance was assessed using the Statistical Methods described below.

**Principal Component Analysis of Chromatin Features in TOP2A CCR Genomic Landscape**

The correlation between CCRs identified by high throughput sequencing in a union set of all amplified DMSO and TOP2 poison treated samples (*c.f.* Supplemental Table S1) and signals of chromatin features for K562 cells was investigated using a principal component analysis (PCA) ([Huff et al. 2010](#_ENREF_10)) in order to define the genomic environments in which the CCRs occur.

The genome-wide signal data from The ENCODE Project Consortium 2012 for H3K4me1, H3K27ac, H3K27me3, H3K36me3, H3K4me3, H3K79me2, H3K9ac, H3K9me1, H3K9me3, H4K20me1, H2AFZ, POLR2A sites and DNase I hypersensitivity sites (DHSs) ([www.encodeproject.org](http://www.encodeproject.org)) ([The ENCODE Project Consortium 2012](#_ENREF_28)) (*c.f.* Supplemental Table S4 for GEO Accession numbers and Production Laboratories) were first converted from GRCh37/hg19 to the GRCh38/hg38 genome assembly using liftOver (<http://genome.sph.umich.edu/wiki/LiftOver>) ([Hinrichs et al. 2006](#_ENREF_9)). The clustering of chromatin features with TOP2A CCRs was investigated using customized R script and K-means clustering algorithms. The data were plotted in a matrix in order to determine the covariance of the features using described methodology ([Huff et al. 2010](#_ENREF_10)).

**Statistical Methods**

The cor function of Pearson Method in R (<https://www.r-project.org>) ([R Core Team 2015](#_ENREF_24)) was used to compute correlation coefficients for read densities between samples. For large-scale multiple testing, p-values were adjusted using the p.adjust function in R for false discovery rate (FDR) calculation, and p ≤ 0.05 was considered significant at FDR < 5%. Pearson chi-squared test was used to compare enrichment/depletion of CCRs in genomic elements *vs.* genome background, *KMT2A* recombinome *vs.* all genes, and all cancer fusion genes *vs.* all genes; TOP2A DSBs in *KMT2A* recombinome *vs.* all genes; average CCR signal *vs.* length; transcript abundance *vs.* average CCR signal by length category. Kruskal-Wallis Test was used to determine whether genome-wide distributions of two different populations of features were identical or different without expecting them to follow a normal distribution for the following comparisons: SNP frequencies at CCR centers *vs.* flanking 10 kb; transcript abundance for genes with CCRs *vs.* all genes; DNase I signal density distribution in genes that overlap *vs.* do not overlap with CCRs; H3K36me3 signal strength in genes with *vs.* without CCRs; POLR2A signal strength in genes with *vs.* without CCRs; H3K4me1/H3K27ac signal strength in CCR center *vs.* flanking 1 kb. Correlation coefficients between transcript abundance and length were calculated using the cor function of Pearson Method in R ([R Core Team 2015](#_ENREF_24)).

**DATA ACCESS INSTRUCTIONS**

All data were deposited in Gene Expression Omnibus (GEO; Accession number GSE79593).

All data can also be located on the UCSC Genome Browser through the URL [https://genome.ucsc.edu/cgi-bin/hgCustom](https://genome.ucsc.edu/cgi-bin/hgCustom" \t "_blank): by uploading the track URLs below for links to the individual samples studied:

track type=bigWig name="K562-Amp-Input" color=0,0,0 smoothingWindow=16 autoScale=on viewLimits=0.1:80 visibility=2 yLineMark=10.0 yLine=on description="K562-Amp-Input" bigDataUrl=[http://gregorylab.bio.upenn.edu/UCSC_GBrowser/K562-Amp-Input_filter.bw](http://gregorylab.bio.upenn.edu/UCSC_GBrowser/K562-Amp-Input_filter.bw" \t "_blank)

track type=bigWig name="K562_1A" color=0,255,0 smoothingWindow=16 autoScale=on viewLimits=0.1:80 visibility=2 yLineMark=10.0 yLine=on description="K562_1A" bigDataUrl=[http://gregorylab.bio.upenn.edu/UCSC_GBrowser/K562_1A_filter.bw](http://gregorylab.bio.upenn.edu/UCSC_GBrowser/K562_1A_filter.bw" \t "_blank)

track type=bigWig name="K562_1B" color=150,150,0 smoothingWindow=16 autoScale=on viewLimits=0.1:20 visibility=2 yLineMark=10.0 yLine=on description="K562_1B" bigDataUrl=[http://gregorylab.bio.upenn.edu/UCSC_GBrowser/K562_1B_filter.bw](http://gregorylab.bio.upenn.edu/UCSC_GBrowser/K562_1B_filter.bw" \t "_blank)

track type=bigWig name="K562_1C" color=255,0,0 smoothingWindow=16 autoScale=on viewLimits=0.1:80 visibility=2 yLineMark=10.0 yLine=on description="K562_1C" bigDataUrl=[http://gregorylab.bio.upenn.edu/UCSC_GBrowser/K562_1C_filter.bw](http://gregorylab.bio.upenn.edu/UCSC_GBrowser/K562_1C_filter.bw" \t "_blank)

track type=bigWig name="K562_2A" color=0,255,0 smoothingWindow=16 autoScale=on viewLimits=0.1:80 visibility=2 yLineMark=10.0 yLine=on description="K562_2A" bigDataUrl=[http://gregorylab.bio.upenn.edu/UCSC_GBrowser/K562_2A_filter.bw](http://gregorylab.bio.upenn.edu/UCSC_GBrowser/K562_2A_filter.bw" \t "_blank)

track type=bigWig name="K562_2B" color=150,150,0 smoothingWindow=16 autoScale=on viewLimits=0.1:20 visibility=2 yLineMark=10.0 yLine=on description="K562_2B" bigDataUrl=[http://gregorylab.bio.upenn.edu/UCSC_GBrowser/K562_2B_filter.bw](http://gregorylab.bio.upenn.edu/UCSC_GBrowser/K562_2B_filter.bw" \t "_blank)

track type=bigWig name="K562_2C" color=255,0,0 smoothingWindow=16 autoScale=on viewLimits=0.1:20 visibility=2 yLineMark=10.0 yLine=on description="K562_2C" bigDataUrl=[http://gregorylab.bio.upenn.edu/UCSC_GBrowser/K562_2C_filter.bw](http://gregorylab.bio.upenn.edu/UCSC_GBrowser/K562_2C_filter.bw" \t "_blank)

track type=bigWig name="K562_4-1" color=0,255,0 smoothingWindow=16 autoScale=on viewLimits=0.1:40 visibility=2 yLineMark=10.0 yLine=on description="K562_4-1" bigDataUrl=[http://gregorylab.bio.upenn.edu/UCSC_GBrowser/K562_4-1_filter.bw](http://gregorylab.bio.upenn.edu/UCSC_GBrowser/K562_4-1_filter.bw" \t "_blank)

track type=bigWig name="K562_4-2" color=0,0,255 smoothingWindow=16 autoScale=on viewLimits=0.1:20 visibility=2 yLineMark=10.0 yLine=on description="K562_4-2" bigDataUrl=[http://gregorylab.bio.upenn.edu/UCSC_GBrowser/K562_4-2_filter.bw](http://gregorylab.bio.upenn.edu/UCSC_GBrowser/K562_4-2_filter.bw" \t "_blank)

track type=bigWig name="K562_4-3" color=0,150,150 smoothingWindow=16 autoScale=on viewLimits=0.1:40 visibility=2 yLineMark=10.0 yLine=on description="K562_4-3" bigDataUrl=[http://gregorylab.bio.upenn.edu/UCSC_GBrowser/K562_4-3_filter.bw](http://gregorylab.bio.upenn.edu/UCSC_GBrowser/K562_4-3_filter.bw" \t "_blank)

track type=bigWig name="K562_4-4" color=150,150,0 smoothingWindow=16 autoScale=on viewLimits=0.1:40 visibility=2 yLineMark=10.0 yLine=on description="K562_4-4" bigDataUrl=[http://gregorylab.bio.upenn.edu/UCSC_GBrowser/K562_4-4_filter.bw](http://gregorylab.bio.upenn.edu/UCSC_GBrowser/K562_4-4_filter.bw" \t "_blank)

track type=bigWig name="K562_4-5" color=0,150,150 smoothingWindow=16 autoScale=on viewLimits=0.1:30 visibility=2 yLineMark=10.0 yLine=on description="K562_4-5" bigDataUrl=[http://gregorylab.bio.upenn.edu/UCSC_GBrowser/K562_4-5_filter.bw](http://gregorylab.bio.upenn.edu/UCSC_GBrowser/K562_4-5_filter.bw" \t "_blank)

track type=bigWig name="K562-Input" color=0,0,0 smoothingWindow=16 autoScale=on viewLimits=0.1:80 visibility=2 yLineMark=10.0 yLine=on description="K562-Input" bigDataUrl=[http://gregorylab.bio.upenn.edu/UCSC_GBrowser/K562-Input_filter.bw](http://gregorylab.bio.upenn.edu/UCSC_GBrowser/K562-Input_filter.bw" \t "_blank)

track type=bigWig name="K562_3A" color=0,255,0 smoothingWindow=16 autoScale=on viewLimits=0.1:80 visibility=2 yLineMark=10.0 yLine=on description="K562_3A" bigDataUrl=[http://gregorylab.bio.upenn.edu/UCSC_GBrowser/K562_3A_filter.bw](http://gregorylab.bio.upenn.edu/UCSC_GBrowser/K562_3A_filter.bw" \t "_blank)

track type=bigWig name="K562_3B" color=150,150,0 smoothingWindow=16 autoScale=on viewLimits=0.1:20 visibility=2 yLineMark=10.0 yLine=on description="K562_3B" bigDataUrl=[http://gregorylab.bio.upenn.edu/UCSC_GBrowser/K562_3B_filter.bw](http://gregorylab.bio.upenn.edu/UCSC_GBrowser/K562_3B_filter.bw" \t "_blank)

track type=bigWig name="K562_3C" color=255,0,0 smoothingWindow=16 autoScale=on viewLimits=0.1:80 visibility=2 yLineMark=10.0 yLine=on description="K562_3C" bigDataUrl=[http://gregorylab.bio.upenn.edu/UCSC_GBrowser/K562_3C_filter.bw](http://gregorylab.bio.upenn.edu/UCSC_GBrowser/K562_3C_filter.bw" \t "_blank)

**SUPPLEMENTAL REFERENCES**

Anders S, Pyl PT, Huber W. 2015. HTSeq--a Python framework to work with high-throughput sequencing data. *Bioinformatics* **31**: 166-169.

Audic S, Claverie JM. 1997. The significance of digital gene expression profiles. *Genome Res* **7**: 986-995.

Bandele OJ, Osheroff N. 2007. Bioflavonoids as poisons of human topoisomerase II alpha and II beta. *Biochemistry* **46**: 6097-6108.

Bansal H, Yihua Q, Iyer SP, Ganapathy S, Proia DA, Penalva LO, Uren PJ, Suresh U, Carew JS, Karnad AB et al. 2014. WTAP is a novel oncogenic protein in acute myeloid leukemia. *Leukemia* **28**: 1171-1174.

Capranico G, Binaschi M. 1998. DNA sequence selectivity of topoisomerases and topoisomerase poisons. *Biochim Biophys Acta* **1400**: 185-194.

Capranico G, De Isabella P, Tinelli S, Bigioni M, Zunino F. 1993. Similar sequence specificity of mitoxantrone and VM-26 stimulation of in vitro DNA cleavage by mammalian DNA topoisomerase II. *Biochemistry* **32**: 3038-3046.

Felix CA, Lange BJ, Hosler MR, Fertala J, Bjornsti MA. 1995. Chromosome band 11q23 translocation breakpoints are DNA topoisomerase II cleavage sites. *Cancer Res* **55**: 4287-4292.

Harrow J, Frankish A, Gonzalez JM, Tapanari E, Diekhans M, Kokocinski F, Aken BL, Barrell D, Zadissa A, Searle S et al. 2012. GENCODE: the reference human genome annotation for The ENCODE Project. *Genome Res* **22**: 1760-1774.

Hinrichs AS, Karolchik D, Baertsch R, Barber GP, Bejerano G, Clawson H, Diekhans M, Furey TS, Harte RA, Hsu F et al. 2006. The UCSC Genome Browser Database: update 2006. *Nucleic Acids Res* **34**: D590-598.

Huff JT, Plocik AM, Guthrie C, Yamamoto KR. 2010. Reciprocal intronic and exonic histone modification regions in humans. *Nat Struct Mol Biol* **17**: 1495-1499.

Kent WJ, Sugnet CW, Furey TS, Roskin KM, Pringle TH, Zahler AM, Haussler D. 2002. The human genome browser at UCSC. *Genome Res* **12**: 996-1006.

Kent WJ, Zweig AS, Barber G, Hinrichs AS, Karolchik D. 2010. BigWig and BigBed: enabling browsing of large distributed datasets. *Bioinformatics* **26**: 2204-2207.

Langmead B, Salzberg SL. 2012. Fast gapped-read alignment with Bowtie 2. *Nat Methods* **9**: 357-359.

Li H, Handsaker B, Wysoker A, Fennell T, Ruan J, Homer N, Marth G, Abecasis G, Durbin R, Genome Project Data Processing S. 2009. The Sequence Alignment/Map format and SAMtools. *Bioinformatics* **25**: 2078-2079.

Lovett BD, Lo Nigro L, Rappaport EF, Blair IA, Osheroff N, Zheng N, Megonigal MD, Williams WR, Nowell PC, Felix CA. 2001a. Near-precise interchromosomal recombination and functional DNA topoisomerase II cleavage sites at MLL and AF-4 genomic breakpoints in treatment-related acute lymphoblastic leukemia with t(4;11) translocation. *Proc Natl Acad Sci U S A* **98**: 9802-9807.

Lovett BD, Strumberg D, Blair IA, Pang S, Burden DA, Megonigal MD, Rappaport EF, Rebbeck TR, Osheroff N, Pommier YG et al. 2001b. Etoposide metabolites enhance DNA topoisomerase II cleavage near leukemia-associated MLL translocation breakpoints. *Biochemistry* **40**: 1159-1170.

Meyer C, Hofmann J, Burmeister T, Groger D, Park TS, Emerenciano M, Pombo de Oliveira M, Renneville A, Villarese P, Macintyre E et al. 2013. The MLL recombinome of acute leukemias in 2013. *Leukemia* **27**: 2165-2176.

Mi H, Muruganujan A, Casagrande JT, Thomas PD. 2013. Large-scale gene function analysis with the PANTHER classification system. *Nat Protoc* **8**: 1551-1566.

Mistry AR, Felix CA, Whitmarsh RJ, Mason A, Reiter A, Cassinat B, Parry A, Walz C, Wiemels JL, Segal MR et al. 2005. DNA topoisomerase II in therapy-related acute promyelocytic leukemia. *N Engl J Med* **352**: 1529-1538.

Mitelman F, Johansson B, Mertens F. 2016. Mitelman Database of Chromosome Aberrations and Gene Fusions in Cancer.

Palumbo M, Mabilia M, Pozzan A, Capranico G, Tinelli S, Zunino F. 1994. Conformational properties of topoisomerase II inhibitors and sequence specificity of DNA cleavage. *Journal of molecular recognition : JMR* **7**: 227-231.

Pan J, Sasaki M, Kniewel R, Murakami H, Blitzblau HG, Tischfield SE, Zhu X, Neale MJ, Jasin M, Socci ND et al. 2011. A hierarchical combination of factors shapes the genome-wide topography of yeast meiotic recombination initiation. *Cell* **144**: 719-731.

Quinlan AR, Hall IM. 2010. BEDTools: a flexible suite of utilities for comparing genomic features. *Bioinformatics* **26**: 841-842.

R Core Team. 2015. R: A language and environment for statistical computing. R Foundation for Statistical Computing, Vienna, Austria. <http://www.R-project.org>.

Ram O, Goren A, Amit I, Shoresh N, Yosef N, Ernst J, Kellis M, Gymrek M, Issner R, Coyne M et al. 2011. Combinatorial patterning of chromatin regulators uncovered by genome-wide location analysis in human cells. *Cell* **147**: 1628-1639.

Robinson BW, Cheung NK, Kolaris CP, Jhanwar SC, Choi JK, Osheroff N, Felix CA. 2008. Prospective tracing of MLL-FRYL clone with low MEIS1 expression from emergence during neuroblastoma treatment to diagnosis of myelodysplastic syndrome. *Blood* **111**: 3802-3812.

The 1000 Genomes Project Consortium. 2015. A global reference for human genetic variation. *Nature* **526**: 68-74.

The ENCODE Project Consortium. 2012. An integrated encyclopedia of DNA elements in the human genome. *Nature* **489**: 57-74.

Trapnell C, Pachter L, Salzberg SL. 2009. TopHat: discovering splice junctions with RNA-Seq. *Bioinformatics* **25**: 1105-1111.

Whitmarsh RJ, Saginario C, Zhuo Y, Hilgenfeld E, Rappaport EF, Megonigal MD, Carroll M, Liu M, Osheroff N, Cheung NK et al. 2003. Reciprocal DNA topoisomerase II cleavage events at 5'-TATTA-3' sequences in MLL and AF-9 create homologous single-stranded overhangs that anneal to form der(11) and der(9) genomic breakpoint junctions in treatment-related AML without further processing. *Oncogene* **22**: 8448-8459.

Wickham H. 2009. *ggplot2: Elegant Graphics for Data Analysis*. Springer-Verlag, New York.
