# Supplementary material for: Genome-wide TOP2A DNA cleavage is biased toward translocated and highly transcribed loci
Source: HighWire-hosted journal article supplement (doi:10.1101/gr.211615.116), 2017-04-06
Supplement: Supplemental_Table_S1.docx [file Supplemental_Table_S1.docx]

| **Supplemental Table S1. K562 Cell Samples Analyzed by Sequencing of TOP2A Cleavage Complexes** | | | | | | |
| --- | --- | --- | --- | --- | --- | --- |
| **Sample Set –Label** | **Treatment** | **Amplified (Yes/No)** | **Raw Reads Mapped to GRCh38/hg38 (%)** | **Unique Reads Mapped to GRCh38/hg38 (%)** | **DNA DSBs (%)** | **CCR count** |
| 1-A | DMSO | Y | 62 257 915 (96.1%) | 43 320 701 (69.6%) | 2.58% | 97 559 |
| 1-B | Etoposide | Y | 62 570 683 (96.2%) | 43 929 297 (70.2%) | 3.07% | 21 748 |
| 1-C | *p*-benzoquinone | Y | 62 788539 (96.5%) | 44 017 809 (70.1%) | 2.90% | 63 053 |
| 2-A | DMSO | Y | 60 891 617 (95.4%) | 43 457 580 (71.4%) | 2.96% | 37 460 |
| 2-B | Etoposide | Y | 57 123 273 (95.5%) | 40 656 913 (71.2%) | 3.40% | 12 880 |
| 2-C | *p*-benzoquinone | Y | 59 141 098 (95.5%) | 41 546 300 (70.3%) | 2.33% | 302 199 |
| 3-A | DMSO | N | 58 870 379 (98.4%) | 42 931 067 (72.9%) | 1.61% | 14 825 |
| 3-B | Etoposide | N | 61 247 182 (98.4%) | 44 838 217 (73.2%) | 1.37% | 49 770 |
| 3-C | *p*-benzoquinone | N | 57 230 014 (97.9%) | 42 225 543 (73.8%) | 1.33% | 95 168 |
| 4-1 | DMSO | Y | 43 778 324 (95.8%) | 29 642 204 (67.7%) | 2.27% | 182 877 |
| 4-2 | Mitoxantrone | Y | 45 765 674 (95.4%) | 30 922 307 (67.6%) | 2.69% | 202 926 |
| 4-3 | Genistein | Y | 41 047 992 (95.6%) | 27 946 375 (68.1%) | 2.31% | 213 082 |
| 4-4 | Etoposide | Y | 43 323 770 (95.1%) | 29 515 007 (68.1%) | 2.18% | 149 898 |
| 4-5 | Genistein | Y | 43 562 503 (95.4%) | 29 581 142 (67.9%) | 2.35% | 212 846 |
| Input | DMSO | Y | 61086 259 (96.9%) | 42 348 371 (69.3%) |  |  |
| Input | DMSO | N | 59 213 443 (99.0%) | 42 634 567 (72.0%) |  |  |
| a. Samples within same set processed together. | | | | | |
