# Supplementary material for: Genome-wide TOP2A DNA cleavage is biased toward translocated and highly transcribed loci
Source: HighWire-hosted journal article supplement (doi:10.1101/gr.211615.116), 2017-04-06
Supplement: Supplemental_Table_S2.docx [file Supplemental_Table_S2.docx]

| **Supplemental Table S2. Genes Containing Strong CCR Signals Genome Wide in Union Set of Amplified *p*-Benzoquinone-Treated Samples** | | | | | |
| --- | --- | --- | --- | --- | --- |
| **Gene** | **Chr** | **CCR Start** | **CCR Stop** | **ID** | **HP10M** |
| *KMT2A* | 11 | 118505951 | 118514239 | Chr11-118505951 | 1816.82* |
| ***KMT2A*** | **11** | **118483578** | **118485774** | **Chr11-118483578** | **221.47** |
| *CYP4B1* | 1 | 46817396 | 46817562 | Chr1-46817396 | 135.13 |
| *GALNT18* | 11 | 11336565 | 11336706 | Chr11-11336565 | 98.62 |
| *AFF3* | 2 | 99870300 | 99870498 | Chr2-99870300 | 73.95 |
| *GABRB3* | 15 | 26596027 | 26596229 | Chr15-26596027 | 72.75 |
| *MAP3K12* | 12 | 53487740 | 53487901 | Chr12-53487740 | 68.64 |
| *L3MBTL4* | 18 | 6020041 | 6020849 | Chr18-6020041 | 68.61 |
| *TXLNB* | 6 | 139259159 | 139259427 | Chr6-139259159 | 68.15 |
| *TMEM72* | 10 | 44933872 | 44934119 | Chr10-44933872 | 66.71 |
| ***KMT2A*** | **11** | **118489138** | **118490140** | **Chr11-118489138** | **66.51** |
| *RBFOX1* | 16 | 6771753 | 6771912 | Chr16-6771753 | 66.47 |
| *FAM13A* | 4 | 88859694 | 88859839 | Chr4-88859694 | 63.82 |
| *C4BPB* | 1 | 207018342 | 207018967 | Chr1-207018342 | 63.78 |
| *LRAT* | 4 | 154696990 | 154697620 | Chr4-154696990 | 63.77 |
| *SMG6* | 17 | 2211734 | 2212163 | Chr17-2211734 | 63.56 |
| *SLC39A8* | 4 | 102283539 | 102283670 | Chr4-102283539 | 62.37 |
| *PRKCB* | 16 | 23937690 | 23938098 | Chr16-23937690 | 62.1 |
| *CNTNAP2* | 7 | 147885313 | 147885766 | Chr7-147885313 | 61.86 |
| *AIFM3* | 22 | 20973776 | 20974870 | Chr22-20973776 | 61.53 |
| *ITGA9* | 3 | 37620303 | 37620858 | Chr3-37620303 | 58.7 |
| *UNC13A* | 19 | 17642104 | 17642260 | Chr19-17642104 | 58.5 |
| *ADAMTS12* | 5 | 33734711 | 33735211 | Chr5-33734711 | 58.47 |
| *FABP6* | 5 | 160198403 | 160198938 | Chr5-160198403 | 58.21 |
| *CORIN* | 4 | 47708288 | 47708447 | Chr4-47708288 | 58.01 |
| *TCF7L1* | 2 | 85182481 | 85182639 | Chr2-85182481 | 57.53 |
| *ANKRD11* | 16 | 89470283 | 89470449 | Chr16-89470283 | 57.52 |
| *GBP2* | 1 | 89117580 | 89118379 | Chr1-89117580 | 57.5 |
| *ZNF428* | 19 | 43613871 | 43614248 | Chr19-43613871 | 57.03 |
| *SERP2* | 13 | 44388342 | 44388684 | Chr13-44388342 | 56.79 |
| *LRP4* | 11 | 46859043 | 46859275 | Chr11-46859043 | 56.31 |
| *PBX4* | 19 | 19608755 | 19609005 | Chr19-19608755 | 56.07 |
| *SH3BP5* | 3 | 15280087 | 15280427 | Chr3-15280087 | 56.05 |
| *GLT8D2* | 12 | 103994521 | 103994918 | Chr12-103994521 | 56.05 |
| *LARGE* | 22 | 33654332 | 33654474 | Chr22-33654332 | 55.34 |
| *THSD4* | 15 | 71314985 | 71315476 | Chr15-71314985 | 55.08 |
| ***KMT2A*** | **11** | **118481837** | **118482559** | **Chr11-118481837** | **54.87** |
| *CRTAC1* | 10 | 97978403 | 97979287 | Chr10-97978403 | 53.37 |
| *CNTNAP2* | 7 | 148025458 | 148025618 | Chr7-148025458 | 53.17 |
| *GPC5* | 13 | 91446384 | 91446787 | Chr13-91446384 | 53.15 |
| *PLXNA4* | 7 | 132581040 | 132581810 | Chr7-132581040 | 53.11 |
| *FRMPD2* | 10 | 48222249 | 48223052 | Chr10-48222249 | 53.11 |
| *ESRRB* | 14 | 76365895 | 76366071 | Chr14-76365895 | 52.93 |
| *PCOLCE2* | 3 | 142858128 | 142858281 | Chr3-142858128 | 52.69 |
| *DLGAP4* | 20 | 36407895 | 36408552 | Chr20-36407895 | 52.63 |
| *KLHL22* | 22 | 20441721 | 20442886 | Chr22-20441721 | 52.6 |
| *GNB1L* | 22 | 19851447 | 19852597 | Chr22-19851447 | 52.38 |
| *ZCCHC17* | 1 | 31311337 | 31311487 | Chr1-31311337 | 52.21 |
| *ELMO1* | 7 | 37070193 | 37070788 | Chr7-37070193 | 51.95 |
| *KIF21B* | 1 | 201020714 | 201020900 | Chr1-201020714 | 51.95 |
| *SAMD4A* | 14 | 54636259 | 54636406 | Chr14-54636259 | 51.24 |
| *IL1RAPL2* | X | 104977445 | 104977605 | ChrX-104977445 | 51.23 |
| *WSCD2* | 12 | 108147159 | 108147322 | Chr12-108147159 | 51 |
| *GNB1L* | 22 | 19832629 | 19832933 | Chr22-19832629 | 50.99 |
| *GLIS1* | 1 | 53557959 | 53558295 | Chr1-53557959 | 50.74 |
| *TOX2* | 20 | 44034657 | 44035280 | Chr20-44034657 | 50.69 |
| a. Individual CCRs in the merged amplified *p-*benzoquinone treated samples were ranked by cleavage signal calculated as described in Supplemental Methods. Strong CCRs were defined as those with signals above 50 HP10M. **Bold** indicates CCR in *KMT2A* bcr. *Broad peak only seen in sample 2-C surrounds a *Kpn*I fragment on hand in laboratory and may suggest false positive; location is not in *KMT2A* bcr. | | | | | |
