# Supplementary material for: Genome-wide TOP2A DNA cleavage is biased toward translocated and highly transcribed loci
Source: HighWire-hosted journal article supplement (doi:10.1101/gr.211615.116), 2017-04-06
Supplement: Supplemental_Table_S3.docx [file Supplemental_Table_S3.docx]

| **Supplemental Table S3. Top 10 Genes Known to be Involved in Translocations (**[**Mitelman et al. 2016**](#_ENREF_1)**) with *≥* 1 CCR Ranked by Genic CCR Signal Strength (HP10M)** | | | |
| --- | --- | --- | --- |
| **K562 Cell Treatment** | **Gene** | **Genic CCR Signal HP10M** | **Disease** |
| DMSO | *SPINT1* | 59.20 | adenocarcinoma large intestine |
| *WDR53* | 40.91 | squamous cell lung carcinoma |
| *YTHDF2* | 39.94 | acute myeloid leukemia, breast carcinoma |
| *PPCS* | 39.58 | acute myeloid leukemia |
| *TXNDC15* | 35.34 | astrocytoma III-IV |
| *SNF8* | 35.08 | breast cancer |
| *DSTYK* | 34.18 | astrocytoma III-IV |
| *SCAMP4* | 33.84 | DLBCL, prostate cancer |
| *SLC7A7* | 33.00 | undifferentiated lung carcinoma |
| *CCND2* | 31.86 | acute lymphocytic leukemia |
| VP16 | *ACTR3C* | 36.00 | squamous cell carcinoma |
| *CREB3L4* | 30.38 | acute myeloid leukemia, breast carcinoma |
| *ZNF577* | 29.07 | prostate carcinoma, astrocytoma III-IV |
| *ZNF394* | 28.88 | acute myeloid leukemia |
| *AMACR* | 27.84 | prostate carcinoma, transitional cell bladder carcinoma |
| *TNK1* | 27.83 | acute myeloid leukemia |
| *TNFSF11* | 27.34 | lung carcinoma |
| *NCKIPSD* | 27.15 | therapy-related AML |
| *NASP* | 26.82 | adenocarcinomas lung and breast |
| *PLAUR* | 26.67 | acute myeloid leukemia |
| Mitoxantrone | *PARP1* | 73.61 | melanoma |
| *ARL2* | 66.14 | breast carcinoma |
| *B3GALT1* | 64.52 | melanoma and breast carcinoma |
| *WDR53* | 64.205 | squamous cell lung carcinoma |
| *TPR* | 63.855 | thyroid papillary carcinoma |
| *CCKBR* | 62.89 | undifferentiated lung carcinoma |
| *SLC26A11* | 62.88 | oral squamous cell carcinoma, breast carcinoma |
| *CDX2* | 61.28 | acute myeloid leukemia |
| *AGTRAP* | 60.79 | adenocarcinoma stomach, lung |
| *SIRT7* | 58.98 | breast carcinoma |
| *p*-benzoquinone | *KMT2A* | 127.56 | AML, ALL |
| *TSPO* | 35.04 | undifferentiated small cell lung carcinoma, breast carcinoma |
| *MIXL1* | 31.88 | malignant melanoma |
| *SEC22B* | 28.72 | breast adenocarcinoma |
| *CXCR4* | 22.20 | acute lymphocytic leukemia |
| *DNAJA2* | 21.26 | adenocarcinoma breast |
| *AP1M2* | 20.28 | astrocytoma III-IV |
| *EPOR* | 20.04 | acute lymphocytic leukemia |
| *ORMDL3* | 19.53 | adenocarcinoma breast |
| *ARHGAP19* | 19.32 | adenocarcinoma breast |
| Genistein | *PLAUR* | 71.87 | acute myeloid leukemia, lung adenocarcinoma |
| *LRRC37B* | 69.84 | acute myeloid leukemia, adenocarcinoma lung and breast |
| *MAPK1* | 68.82 | astrocytoma III-IV, lung and prostate adenocarcinoma |
| *OXA1L* | 63.71 | squamous cell carcinoma lung |
| *MRPL50* | 55.23 | astrocytoma III-IV |
| *BHMT2* | 54.405 | small cell lung carcinoma |
| *LEUTX* | 54.24 | acute myeloid leukemia, astrocytoma I-II |
| *RELA* | 52.54 | erythroleukemia, ependymoma |
| *EIF5A* | 49.995 | breast adenocarcinoma |
| *KLK2* | 49.145 | prostate adencarcinoma |
| a. Merged amplified samples where applicable. | | | |
